# Supplementary material for: Lithium storage in disordered graphitic materials: a semi-quantitative study of the relationship between structure disordering and capacity
Source: Royal Society of Chemistry journal article supplement (doi:10.1039/c4cp05589f), 2015-01-01
Supplement: c4cp05589f1.pdf [file c4cp05589f1.pdf]

## Supporting information for Lithium storage in disordered graphitic material: a semi-quantitative study of the relationship between the disordering and the capacity

Tan Xing, Thrinathreddy Ramireddy, Lu Hua Li, Daniel Gunzelmann, Hong Zeng, Qi Wen, Shaoxiong Zhou and Ying Chen\*

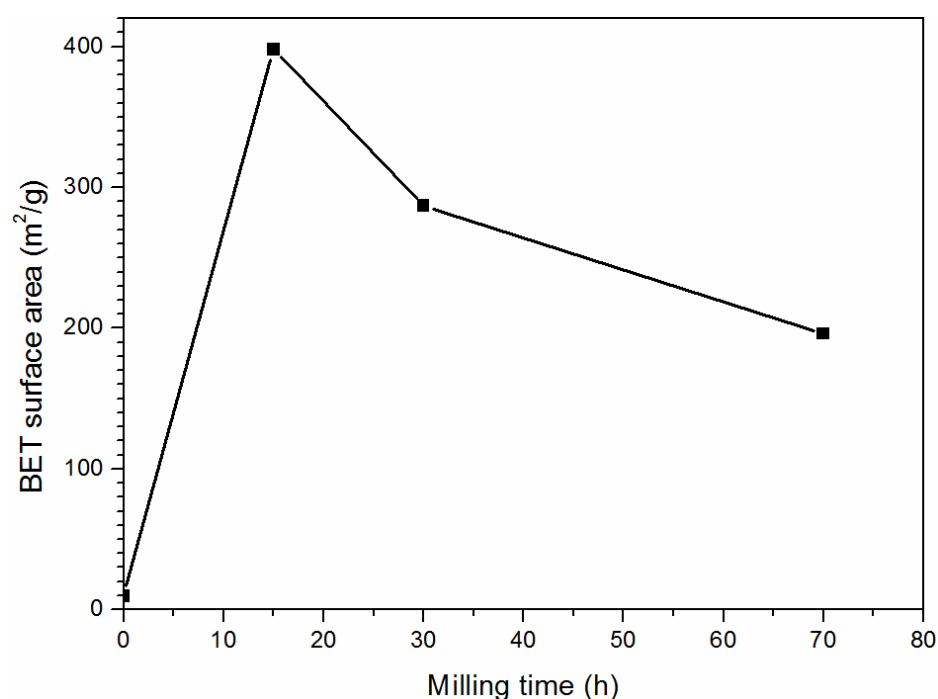

**Fig.S1** BET surface area of CG and ball-milled samples.

The special surface area change during ball milling process has been explained in previous reports [17]

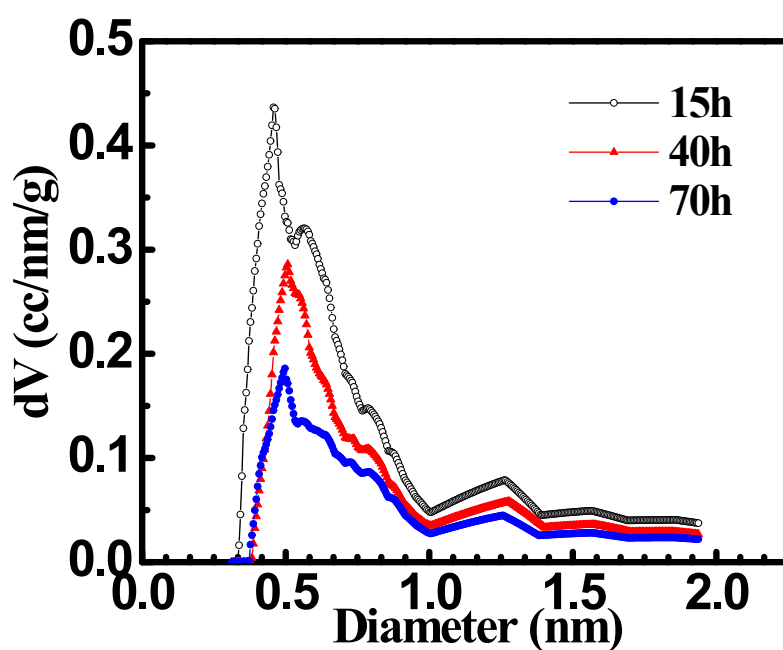

Figure S2. Pore size distribution of the graphite milled for different time.

Nitrogen sorption isotherms were obtained using a Quantachrome Autosorb automated gas sorption system at -196 °C. Specific surface areas and pore size distributions were calculated using the Brunauer-Emmett-Teller (BET) theory and the Horvath-Kawazoe (HK) method based on the adsorption branches. Specific pore volumes were measured at a relative pressure of 0.99.

Table S1 The coulombic efficiency of Ar 15, 70 h and CG electrodes during the first cycle

| Sample | Coulombic efficiency (%) |
|--------|--------------------------|
| CG     | 51.39                    |
| Ar-15  | 40.85                    |
| Ar-30  | 43.63                    |
| Ar-70  | 59.70                    |
